**Full Title: “I wanna live and not think about the future” What place for advance care planning for people living with severe multiple sclerosis and their families? A qualitative study**

**Short title:** Advance care planning for people with multiple sclerosis

**Authors:** Professor Jonathan Koffman <sup>1&2</sup>, Clarissa Penfold <sup>1</sup>, Dr Laura Cottrell <sup>3</sup>, Professor Bobbie Farsides <sup>4</sup>, Professor Catherine J Evans <sup>2</sup>, Dr Rachel Burman <sup>5</sup>, Professor Richard Nicholas <sup>6</sup>, Dr Stephen Ashford <sup>2&6</sup>, Professor Eli Silber <sup>5</sup>.

**Affiliations**

1. Hull York Medical School, Wolfson Palliative Care Research Centre, United Kingdom
2. King’s College London, Cicely Saunders Institute, United Kingdom
3. Faculty of Nursing, Langara College, Vancouver, Canada
4. Brighton and Sussex Medical School, United Kingdom
5. King’s College Hospital NHS Foundation Trust, United Kingdom
6. United Kingdom Multiple Sclerosis Tissue Bank, Burlington Danes, Imperial College London, United Kingdom
7. Regional Hyper-Acute Rehabilitation Unit, Northwick Park Hospital, North West University, United Kingdom

**Corresponding author:** Jonathan Koffman: Email: [Jonathan.koffman@hyms.ac.uk](mailto:Jonathan.koffman@hyms.ac.uk)

**NOTE:** This preprint reports new research that has not been certified by peer review and should not be used to guide clinical practice.

## **ABSTRACT (292 words)**

**Background:** Little is known about how people with multiple sclerosis and their families comprehend advance care planning (ACP) and its relevance in their lives.

**Aim:** To explore under what situations, with whom, how, and why do people with MS and their families engage in ACP

**Methods:** We conducted a qualitative study comprising interviews with people living with MS and their families followed by an ethical discussion group with five health professionals representing specialties working with people affected by MS and their families. Twenty-seven people with MS and 17 family members were interviewed between June 2019 and March 2020. Interviews and the ethical discussion group were audio-recorded and transcribed verbatim. Data were analysed using the framework approach.

**Results:** Participants' narratives focused on three major themes :(i) planning for an uncertain future; (ii) perceived obstacles to engaging in ACP that included uncertainty concerning MS disease progression, negative previous experiences of ACP discussions and prioritising symptom management over future planning; (iii) Preferences for engagement in ACP included a trusting relationship with a health professional and that information then be shared across services. Health professionals accounts from the ethical discussion group departed from viewing ACP as a formal document to that of an ongoing process of seeking preferences and values. They voiced similar concerns to people with MS about uncertainty and when to initiate discussions. Some shared concerns of a lack of confidence when having ACP discussions.

**Conclusion:** These findings support the need for a whole systems strategic approach where information about the potential benefits of ACP in all its forms can be shared with people with MS. Moreover, they highlight the need for health professionals to be skilled and trained

in engaging in ACP discussions and where information is contemporaneously and seamlessly shared across services.

## **INTRODUCTION:**

Multiple sclerosis (MS) is an inflammatory disease of the brain and cord resulting in degeneration that is mostly diagnosed among people between the ages of 20 and 40 years [1]. Globally, an estimated 2.8 million people have MS [2]. People with MS represent a heterogeneous population and their needs vary according to their disability. Although some people with MS have little disability, 15% have a primary progressive course and of those with relapsing-remitting disease, at least half develop secondary progression after 10-15 years [3]. People with MS have a prolonged disease course, often lasting many decades [4]. Many spend a prolonged period 'progressively dwindling' with considerable distress associated with decline [5] punctuated by uncertainty and superimposed illness. In some instances, MS can lead to death due to associated complications associated with the condition [6] [7] [8]. Approximately 40-70% of people with MS develop cognitive impairment and its effects can be profound [9] [10] [11]. Some experience a reduced ability to make decisions that affect every day functioning [12]. These complex problems not only impact people with MS directly but also family members [13] [14].

### **Advance care planning and multiple sclerosis**

Advance care planning is a voluntary process that supports adults to consider and share their values, goals and preferences regarding future care so that if they lose the capacity to make informed decisions for themselves health professionals and their families can provide care consistent with their wishes [15]. ACP is typically bound by a country's respective legal framework for decision making about care and treatments for adults lacking capacity. In the United Kingdom (UK), ACP is regulated by the Mental Capacity Act in England and Wales, with similar provisions by common law in Scotland and Northern Ireland [16]. Planning future care

and treatment in the UK can also comprise several other legally binding processes that include Lasting Power of Attorney (LPA), a voluntary authority given by an individual to another ‘decision maker’ regarding either their ‘property and affairs’, or their ‘health and welfare’ that can include care and treatment. In England Wales, Health and Welfare LPAs are made when an individual has mental capacity, officially registered with the Office of the Public Guardian and only activated when that individual is unable to make decisions for themselves [17]. Under certain circumstances, individuals can also make decisions to decline but not demand treatment. This is referred to as an Advance Decision to Refuse Treatment or ADRT referred to as an advanced directive in other countries [18] [19] [20].

Despite the scepticism of its value [21] [22], an intrinsic logic of ACP continues to drive palliative care research. Potential benefits can include providing important opportunities for discussion of diagnosis and prognosis so care and treatment are aligned with individuals’ preferences, improving symptom discussions, treatment adherence and reducing misunderstandings and conflict between medical staff and families [23]. ACP may also reduce inappropriate emergency hospital admissions, lead to fewer interventions of limited or futile clinical value, lead to earlier access to palliative care, result in fewer hospital deaths and may increase rates of hospice admission or appropriate care at home [8, 24] [25]. ACP is thought to help families prepare for the death of a loved one, to resolve family conflict and lead to better bereavement outcomes [26]. Although primarily concerned with improving the appropriateness and quality of care, ACP may contribute to controlling important health spending and making more appropriate and considered use of scarce resources in end of life [27]. The COVID-19 pandemic, leading to an acute risk of deterioration and dying for many,

prompted many health professionals to engage in ACP discussions with ‘at risk’ individuals [28] [29] [30] [31].

Little research has examined insights about ACP among people with MS [32]. Paradoxically, there is a growing interest among individuals with MS who want to talk about their future with health professionals but this rarely happens [33] [34] [35]. The reasons postulated for this are complex and include uncertainty inherent with MS due to its unpredictable trajectory. This makes it challenging to identify those approaching a point where mental capacity is becoming compromised and/or where life may be limited [36] [37] [38] [39] [40]. Additionally, health professionals may fail to initiate discussions, possibly due to their reticence to discuss disease progression and death and managing their own emotions during difficult conversations [41] [42]. It is for these reasons we aimed to assemble conversations of people living with MS and their families about ACP which are occasionally discussed but rarely voiced and to juxtapose them with health professionals’ views to increase the audibility of their narrative. Our specific research questions were to understand under what situations, with whom, how, and why do people with MS (and their families) engage in ACP and what works for whom, how, and why, during ACP discussions?

## **METHOD**

### **Study design**

Our study made use of multiple data sources using different qualitative methods to understand the complex and nuanced issues associated with ACP relevant to people living with MS and their families from multiple perspectives. First, we conducted interviews with people living with MS and their family members to sensitively tease out the concepts, ideas,

frameworks and structures of meanings associated with ACP. This approach was appropriate for our study because it involved qualitative methods of data collection that were minimally intrusive allowing us to gather data compassionately [43] given the potential vulnerability of participants [44]. We then conducted what we refer to as an ‘ethical discussion group’ where health professionals were invited to participate in a group discussion to examine their reasoning and justification of ethical principles underlying their negotiation of planning, including ACP, with people living with severe MS. Previously, data generated using this approach have helped identify complex ethical, legal, and clinical issues that practitioners experience in assisted reproductive services, embryology, stem-cell research, and solid organ donation [45-48].

### **Setting and participants**

The study was conducted across two main MS services, the first located in southeast London with an estimated 3,000 people with MS, and the second serving west London, Surrey and East Berkshire with an estimated 3,500 people with MS. Eligibility criteria for inclusion in the study included those who were adults aged 18+; having a confirmed diagnosis of MS; an Expanded Disability Status Scale (EDSS) [49] score of  $\geq 6$  suggestive of severe disease (requiring walking aid(s) to walk, to those restricted to a wheelchair, or bed at the upper end of the scale) and; being able to provide informed consent.

### **Sampling and recruitment of people with MS and their families**

The interview component of the study intended to purposefully recruit 30 people with MS up to a point where data saturation would typically be realised. Potential participants were prospectively identified by consultant neurologists at three hospital sites during outpatient









## **Emerging themes from interviews with people with MS and their families**

Three main themes emerged from the analysis of interviews with people with MS and their family members and included (i) planning for an uncertain future; (ii) perceived obstacles to engage in planning and (iii) preferences for engagement in ACP.

### **1. Planning for an uncertain future**

Whilst none had made, or in many instances were not familiar with ACP, more than one-third of participants had engaged in one or more activities associated with planning their care and treatment. For example, they had engaged in more formal planning tools including Lasting Power of Attorney for health and welfare (LPA) (n=9); advance decision to refuse treatment (ADRT) (n=2); and do not attempt cardiopulmonary resuscitation (DNACPR) orders (n=4). The motivations for engaging in each were different. In our study, LPAs were made by people with MS with a range of EDSS scores. Family members of people with MS (including spouse/partner, siblings, parents, and adult children) were often appointed as the 'proxy decision-makers entrusted with making health and care decisions on their behalf. In all cases where people with MS had made an LPA for health and care decisions, they had given their proxy decision-makers authority rather than their doctors or other members of the clinical teams, to refuse or consent to treatment, including life-sustaining treatments. For people with MS with the highest EDSS level (8-8.5), a motivating factor for families to support their dependents making an LPA was guided by their progressive loss of cognitive capacity.

*“Making an LPA was triggered off because I wanted to be able to make decisions on his health because he can't say for himself what he wants. And when his memory was*





Although in some instances professionals suggested patients make an LPA for property and finances, interestingly LPAs for health and welfare were never discussed. Therefore, when this type of LPA had been drafted and registered independently by participants some expressed concerns health professionals would not be aware that they possessed one and worried if their wishes would be honoured.

*“I’ve done an LPA. Now the thing it doesn’t do is communicate that to the professionals. An advance care plan probably would because they would have access to that. They can’t see in my filing cabinet, so they won’t know my wishes. I guess having it formalised and on file somewhere with the lot would definitely be beneficial, otherwise, they’re guessing.”*

(K0004, male PwMS, 36-45 age group, secondary progressive, EDSS 8-8.5)

Typically, participants made LPAs without employing a solicitor. However, they described it as a “challenging” “tedious” and expensive process, involving a not insignificant cost, particularly if subsequent iterations were required.

*“It was really hard making our LPA, but it got progressively easier with each form we did. We sort of got a better handle on what it was they wanted and how they wanted you to do it and things. But you can’t help feeling it could probably be a bit easier still. And they’ve reduced the cost of them, which is another good thing because I think we paid £160 for each of them. A lot of money.”*

(K007, female PwMS, 56-65 age group, secondary progressive, EDSS 6-6.5)







*changed my mind about the DNACPR. I've been thinking a lot about it, and I changed my mind."*

(LG012, female PwMS, 56-65 age group, secondary progressive, EDSS 8-8.5)

## **2. Obstacles for engagement in ACP**

While more than one-third of participants understood the principles of ACP and engaged in some type of formal planning-related activity, most had not. The interviews brought into sharp relief several barriers to engagement in this activity that included uncertainty relating to MS, negative experiences of ACP-related discussions with health professionals, familial relationships, transitioning from disease-modifying treatment to supportive care and prioritising symptom management and quality of life over intermediate and long-term planning. A number of these issues are enriched by and have correspondence with the views shared by participants involved in the ethical discussion group.

### ***Uncertainty relating to the MS illness trajectory***

Many participants with MS and their family members' attitudes towards ACP and its relevance to them, were influenced by their experience of the MS illness trajectory as being inherently uncertain. Attitudes towards ACP in the context of an uncertain illness fell into three main groups. For one group, fear of an uncertain future acted as a barrier to engaging with ACP. Participants balanced their awareness of possible illness trajectories of increasing disability with the hope it would not apply to them. Some readily admitted their coping strategy to live alongside an overwhelming situation was to stick their 'head in the sand' or deceive themselves about their condition for example.





them. They were left feeling threatened with an overarching suspicion their care was going to be rationed or curtailed, typified by the following.

*“There’s one thing that you’ve really got to be careful about. I was in hospital and had yet another doctor who wanted me to sign, wanted me to agree to a power to [refuse treatment] ... it’s kind of really dodgy, you know, you know [laughs], I’m very suspicious now.”*

(GST002, male PwMS, 46-55 age group, primary progressive, EDSS 8-8.5)

*“I argued with one of the doctors in hospital because they had it on my record, Do Not Resuscitate and I said, “I don’t remember ever saying that!”, he said, “Oh, we’ll change it back then”, so I said’ “Yeah you will!”, ‘But I never said I didn’t want to be resuscitated’*

(LG014, male PwMS, 56-65 age group, secondary progressive, EDSS 7)

For some participants with an LPA in place, negative experiences of ACP-related discussions with clinicians led to an erosion of trust and disengagement with services. For example, where participants had agreed to a palliative care referral for additional supportive symptom care, they quickly became wary of early uninvited discussions about end-of-life planning including decisions to refuse life-sustaining treatment. Their efforts were focused on experiencing a better quality of life, not preparing to die. Consequently, some participants, illustrated by the following comment, disengaged with palliative care, thus losing potentially valuable support.







*"You've got to have some very gentle way of approaching it, whereby people don't have to face the stark reality if they don't want to. There's got to be a middle way somewhere... just a gentle way of starting the conversation should someone want it, that's what needs to be found in my opinion. Round about that, you know, change of relapsing-remitting to progressive, I think that would be a good time to broach it."*

(K011, male PwMS, 36-45 age group, secondary progressive, EDSS 8-8.5)

*"I know a lot of people with MS get depressed. It (ACP) would have to be done very tactfully indeed and at the right time. But if it can be introduced as a sort of vague thing people can kind of mull over it a bit and come back to it when they want to."*

(K008, female PwMS, 56-65 age group, secondary progressive, EDSS 7.5)

### **The ethical discussion group**

Five health professionals consented to participate in the ethical discussion group including an MS clinical nurse specialist, consultant neurologist, consultant in palliative care, consultant physiotherapist and a general practitioner. The ethical discussion group revealed a shift of thinking in professionals' previous attitudes and beliefs regarding ACP, all of which had implications for their current practice and how they wished to engage in this process. Specifically, those working in palliative care and general practice shared that earlier in their careers they saw ACP as an appropriate and useful intervention where a formal, structured approach was essential; they later became doubtful that in this format it conferred benefits that accorded with patients' preferences (refer to table 4 for emerging themes and illustrative examples of health professionals' narratives). They noted that since MS is a long-term neurodegenerative condition, if ACP was pursued, it should be refashioned to become a



delicate conversations into the all too brief appointments was acknowledged and this troubled them. Whilst the clinical nurse specialist, suggested by the people with MS as being the most appropriate professional to have these conversations with, exposed his/her lack of confidence in the skills necessary to initiate the carefully worded dialogue with patients, a fear of getting it wrong and causing harm. Another key challenge was associated with how ACP conversations were shared with other professionals. For example, a consultant neurologist acknowledged that including details obtained less formally during ongoing dialogue with a patient about their values and preferences in a clinic letter may not be the most appropriate way to communicate valuable information, accessible to all relevant parties. The GP participant went further to acknowledge the difficulty in capturing a patient's values and preferences expressed during the 'snippets' of conversations accumulated over many months and more often years in a single summary care record. Participants also described situations where written statements or legal documents relating to ACP were not accessible when needed during a medical crisis which helped no one.

**TABLE 4 LOCATED HERE**

## **DISCUSSION**

This study provides a detailed qualitative understanding of the place and meanings of ACP for those living with MS and their families and contrasts these accounts with those of the health professionals who care for them.

## **Strengths and limitations**

A strength of this study is the detail in which we were able to explore the narratives of people living with severe MS about a sensitive topic, exploring notions of loss, compromised mental capacity and intimations of mortality. Our participants could therefore be described as inhabiting positions of 'intrinsic and situational' vulnerability that puts some at greater risk of being exploited, a justification to exclude them from the research process [44]. However, not engaging with them compromises the ethical principle of justice, particularly when the research at hand spoke so directly to participants' needs and experiences. This study also made use of a multi-data qualitative approach. Specifically, the simultaneous design enabled findings from our realist review [32] and interim interview findings from the interviews to be critically considered by ethical discussion group participants that produced a more detailed understanding of the multiple realities associated with ACP.

We acknowledge this study has limitations. First, the interviews were cross-sectional. Whilst study participants were actively encouraged to reflect retrospectively on instances where their views and decisions were triggered by events, we recognise people with progressive diseases for example MS, have, views and needs that change over time. Repeat interviews enable researchers to access and make sense of competing and often contradictory accounts and to understand why views change and have been successfully employed in palliative care research, mostly among those with cancer [56] [57] [58]. Second, data on the experiences of 10 people with MS were obtained with their family members being present rather than talking to them alone. Ideally, people with MS would be consulted directly, but this is not always possible, often because their disabilities, e.g., communication difficulties, prevented it. However, in our study and for those with people with communication

impairments, family members' contributions represented a valuable additional source of data to aid our understanding of the experience of people with MS. Third, we are aware we recruited few participants from Black, Asian and ethnically diverse communities. This is a cause of concern for a study set in within a metropolitan area where ethnic diversity was present. Evidence suggests that attitudes to truth-telling, filial responsibility, spirituality, notions of patient autonomy and requests for 'aggressive' treatments may be culturally patterned and influence shared decision-making, including ACP [59, 60] [61]. Last, this study reached theoretical saturation just before the first Covid-19 pandemic lockdown in the UK. The pandemic placed many vulnerable patient populations including those with MS, at risk of responding poorly to Covid-19 [62] where there was a greater emphasis on engaging in ACP for vulnerable populations, including those with MS [28] [29] [30] [31, 63]. Although the ethical discussion group participants mentioned practical challenges associated with engaging in ACP-related conversations virtually during the pandemic, we omitted to include perspectives of people living with MS and their families during this critical moment in time. Some may have experienced anxiety from the pandemic [64] amplified by conversations regarding ceilings of treatment and this would be useful to understand.

## **MAIN FINDINGS**

Rather than not wishing to consider their future, we present accounts from many participants who wished exactly to do this, often in concert with their families, albeit with caveats. Their accounts are nuanced and sometimes contradictory which reflect the complexities of ACP [65], a situation amplified with neuro-generative conditions like MS [35]. Below we appraise our study findings alongside the 'context-mechanism-output' configurations [66] that were

tested during our realist review of ACP for people living with MS and their families [32] and wider literature.

### **Recognition of punctuated losses**

For some people with MS, punctuated losses associated with clinically significant disease events [40] [67] [68] [69] [70] have the potential to lead to acceptance of MS as a progressive condition and the creation of a new self-identity where ACP may become relevant. While participants in this study recognised health crises resulting from complications associated with MS could potentially result in death, they did not necessarily equate their situation with dying. Consequently, some were reluctant to consider ACP planning strategies including DNACPR or ADRTs as being relevant to them. This observation is at odds with findings from those with MND, another progressive neuro-generative disease, where ACP was considerably easier for those who accepted encroaching death [71] although it was also present at other stages of the disease, albeit to a lesser extent. Instead, we observed participants were willing to engage in drafting and registering health and welfare LPAs to ensure that a family member could advocate for them if they were ever too sick to communicate themselves or lost cognitive capacity. Consequently, life-sustaining treatments were viewed as appropriate in the context of a treatable acute health issue such as sepsis following a urine infection or aspiration pneumonia. Moreover, having someone to advocate on their behalf brought considerable comfort to participants and family members. The flexibility of an LPA was felt to be important by participants in the context of a fluctuating and uncertain illness and yet was never suggested to them by health professionals.







### **Previous experiences of witnessing poor deaths**

ACP has been reported as a means of mitigating the fear of experiencing a distressing or 'bad' death [86] [80]. In this study, previous experiences of witnessing dying were a clear motivator for some participants to engage in ACP, particularly the decision to make LPA. However, having MS and the prospect of dying were not viewed as the main reasons for engaging in ACP. Indeed, several participants stated explicitly they did not feel they were dying from their condition. For these participants, there was a fundamental belief that ACP and shared-decisional aids were relevant to them in the same way that they might be to anyone else, regardless of health status or condition

### **Conclusions and clinical and research implications**

In our study, people with MS and their families identified or asserted the importance of appropriate, accessible and meaningful information and dialogue to answer questions and uncertainties that would enable and empower them to be able to consider their future. However, this was often absent, a finding present in other studies involving people with MS [87] [88]. Our study participants described a sense of being alone in learning about and managing transitions of their illness. This was particularly so at the 'junction' of disease-modifying therapy to that of supportive care and set within in a context of fragmented or absent information. We believe this is compounded by health professionals, as evidenced in our study, not having the space, training or confidence to sensitively and adequately explore these issues with people with MS or their families, especially in the context of a disease in which some people will die [89]. Troublingly, participants' accounts would suggest this was present among those working in palliative care. Whilst the focus of many health professionals involved in MS in the UK and elsewhere has, appropriately, been one of actively living with

MS, this may have then marginalised those wishing to explore end-of-life issues and ACP. And yet a third of participants had independently made plans, typically LPAs. The question, however, given the disconnect with these plans and health services, is whether they are the most appropriate solutions for these individuals, or if they are enacted to the best effect. We have shown that in previous recent research, where health professionals are involved and this information is communicated to services, preferences can be successfully realised [8].

Implementing high-quality ACP in all its guises relevant to those with MS requires an understanding of how ACP conversations and specific strategies can be brought to occur in a systematic, skilled, empathetic, and consistent manner within and across services. This demands the attention of multiple considerations that reinforce implementing high-quality, holistic, multi-component, and person/family-centric ACP relevant to MS. Bradshaw and colleagues believe a way of operationalising this is best done through a socioecological lens whereby a 'whole systems strategic approach' is employed [90] [91] and acknowledges that multiple, interconnected components must be present for this to be successful [92]. For this study, Figure 1 presents a model of how this approach attends to the individual, interpersonal, organisational, systems and time-based considerations present in our findings. Among other issues, they include the person with MS being knowledgeable about MS illness progression and how that might influence their decision-making, adequate training being available for health professionals about how to engage in ACP-related conversations, efficient IT and administration systems to share patient-based preferences and values, and seeing ACP as a process over time, not a one-time event and revisiting/repeating conversations where necessary as MS progresses.

**FIGURE 1 LOCATED HERE**

Another pressing issue evident in this study is the requirement inherent with ACP for people, principally but not exclusively, living with life-limiting illnesses is to picture choices they would make when facing an uncertain future or health crisis. This is complicated by not knowing how they would feel or what would be important to them in those moments, a situation compounded by incomplete information [22]. MS is typically a progressive condition, punctuated by potentially life-changing and or life-threatening events, where shifts during this condition require people with MS and health professionals to be willing, flexible and prepared to rapidly manoeuvre when prognostic or other disease-related news is surprising, 'bad' or overwhelming. It has recently been suggested the phrase 'advance care planning' should be refashioned to 'adaptive care planning' to reflect the dynamic nature of decision-making that occurs along the continuum of serious or life-threatening illness [93]. People with MS can consequently make decisions that are more responsive or adaptive to the situation that reflects their potentially life-changing situations, for example, the need for assistive aids in the context of their illness as it unfolds. Further development on this approach would include a hybrid version that embraces ACP as a multi-component process but counteracts the false dichotomy of viewing ACP as either decisions 'made in the moment' or for decisions just 'beyond the horizon'. Both are relevant in MS and closely align with the recent UK General Medical Council's Guidance on Decision Making and Consent [94]. One virtue of allowing the opportunity for planning for the future as it unfolds or just beyond the horizon is that it permits health professionals to preserve the trust of people with MS and their families, titrate medical information concerning their deteriorating abilities, regularly review parallel care plans in which two sets of ACP are made; one for stability or improvement, and another for potential further deterioration, highly likely in the severe stages of MS [95]. Participants in the ethical discussion group spoke of this occurring in their practice but it is possible these



**Validation:** Jonathan Koffman, Clarissa Penfold

**Visualization:** Jonathan Koffman

**Writing – original draft:** Jonathan Koffman, Clarissa Penfold

**Writing – review & editing:** Jonathan Koffman, Clarissa Penfold, Catherine Evans, Stephen

Ashford, Laura Cottrell, Eli Silber, Rachel Burman, Richard Nicholas, Bobbie Farsides

## **DECLARATION OF CONFLICTING INTERESTS**

None

## **ACKNOWLEDGEMENTS**

We wish to extend our profound thanks to all those people with MS and their families and health professionals who participated in the interviews and the ethical discussion group. We thank members of the MS Society Research Network specifically, Alison Mack, Julie Clear, Mary Douglas, Patrick Burke and Rebecca Perry for sharing their time in the design of this study.

## **FUNDING**

This study was generously funded by the MS Society [Grant code 93]. Catherine Evans is funded by a Health Education England/ NIHR Senior Clinical Lectureship (ICA-SCL-2015-01-001). The views expressed in this publication are those of the authors and not necessarily those of the NHS, the National Institute of Health Research or the Department of Health and Social Care.
